# Supplementary material for: The short isoform of MS4A7 is a novel player in glioblastoma microenvironment, M2 macrophage polarization, and tumor progression
Source: Springer Nature journal article supplement (doi:10.1186/s12974-023-02766-1), 2023-03-21
Supplement: MOESM1 [file 12974_2023_2766_MOESM1_ESM.pdf]

## Additional file 1

**A**

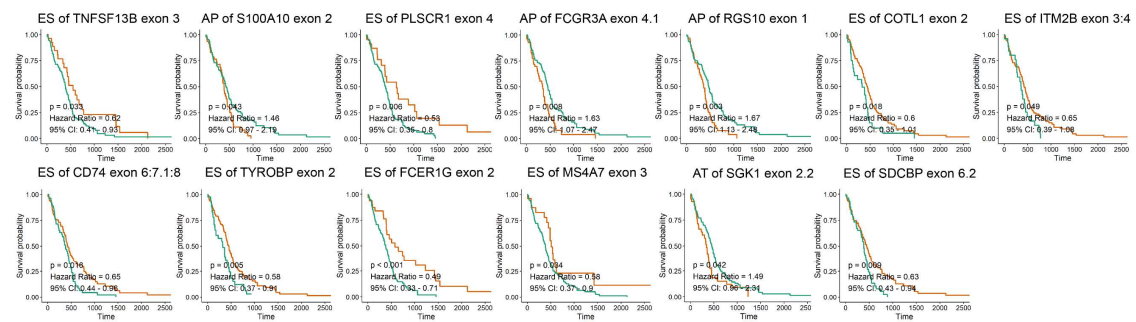

**B**

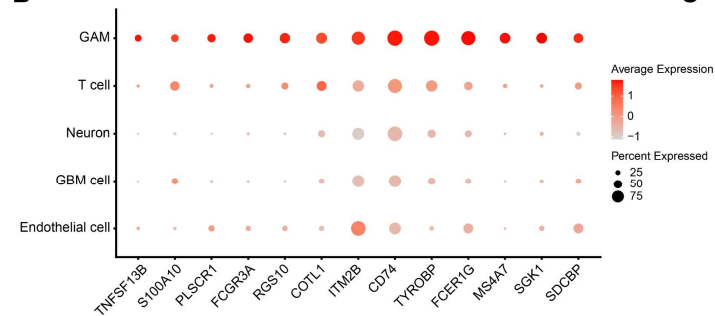

**C**

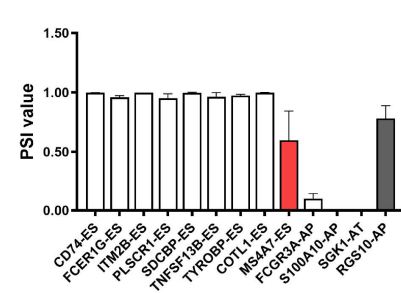

**D**

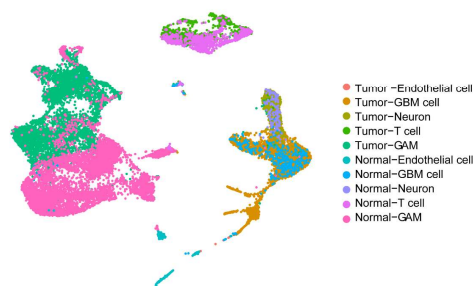

**E**

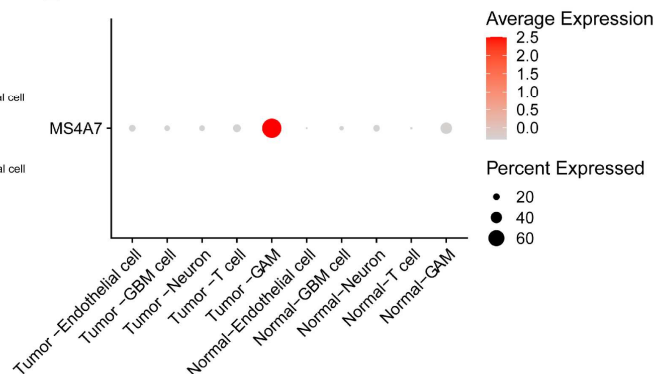

**Figure S1**

**Candidate prognostic splicing events associated plasma membrane-located proteins screened by comprehensive analysis**

(A) Kaplan–Meier survival curves for prognostic splicing events based on SpliceSeq database and TCGA GBM clinical data. (B) Dotplot shows the expression of candidate genes among the different cell types within scRNA-seq data of GBM tissue. (C) Quantitative histograms of PSI value of candidate prognostic splicing events. Data are presented as mean  $\pm$  SD. (D) UMAP plot shows different clusters of cells from GBM tissue and adjacent normal tissue scRNA-seq data. (E) Dotplot of MS4A7 expression levels among different types of cells from GBM tissue and adjacent normal tissue scRNA-seq data.

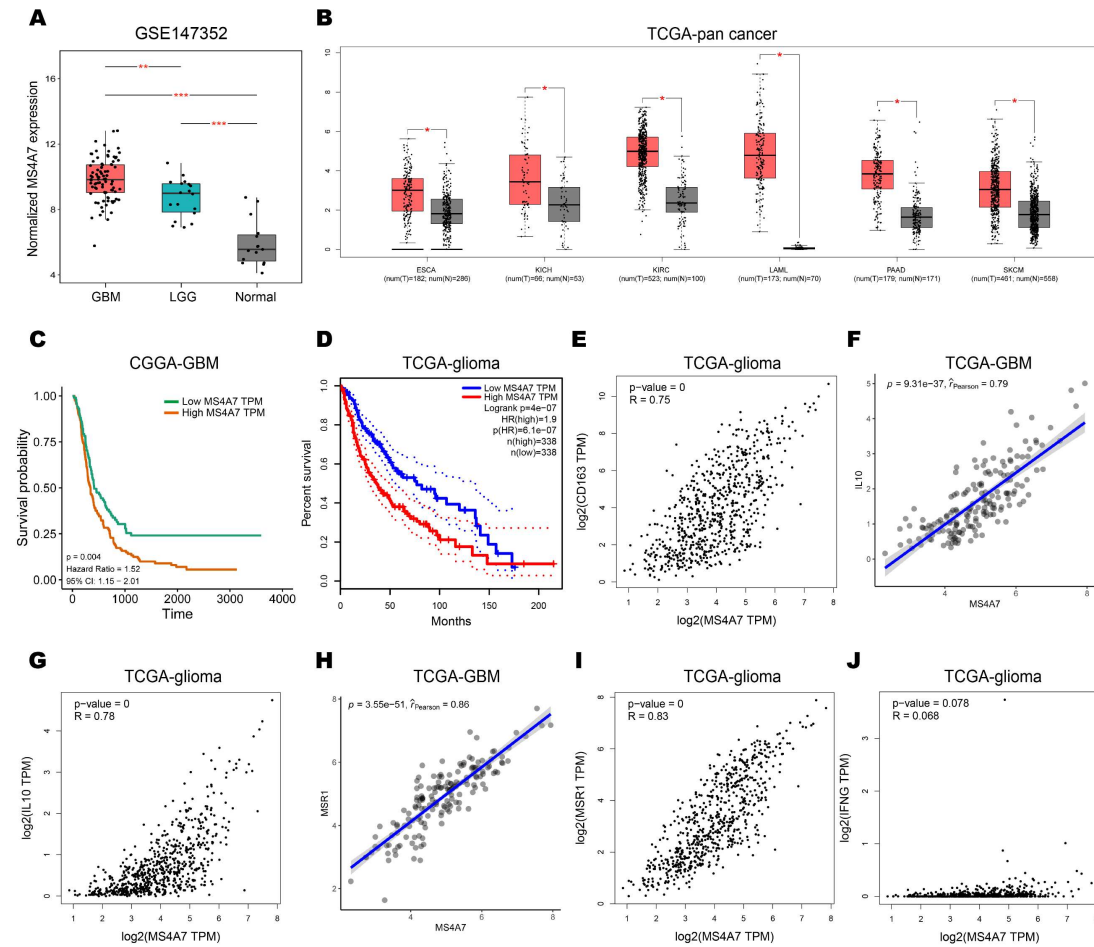

**Figure S2**

**Expression pattern and relevance to the outcome of GBM patients of MS4A7 based on TCGA data and GEO dataset**

(A) Box plot of expression levels of MS4A7 among GBM, LGG and normal tissues based on dataset GSE147352. (B) A Pan-cancer analysis: box plot of MS4A7 expression against corresponding GTEx normal tissues among ESCA, KICH, KIRC, LAML, PAAD and SKCM. (C) Kaplan–Meier survival curves stratified by the expression levels of MS4A7 based on a CGGA GBM dataset. (D) Kaplan–Meier survival curves stratified by the expression levels of MS4A7 based on TCGA glioma dataset. (E) The correlation of MS4A7 with CD163 mRNA expression was analyzed with Pearson's test. Data were obtained from the TCGA glioma dataset. (F, G) The correlation of MS4A7 with IL10 mRNA expression was analyzed with Pearson's test. Data were obtained from the TCGA GBM and glioma dataset. (H, I) The correlation of MS4A7 with MSR1 mRNA expression was analyzed with Pearson's test. Data were obtained from the TCGA GBM and glioma dataset. (J) The correlation of MS4A7 with IFNG mRNA expression was analyzed with Pearson's test. Data were obtained from the TCGA glioma dataset. Statistical significances were analyzed by one-way ANOVA (A) and Wilcoxon test (B). \* $P < 0.05$ , \*\* $P < 0.01$ , \*\*\* $P < 0.001$ .

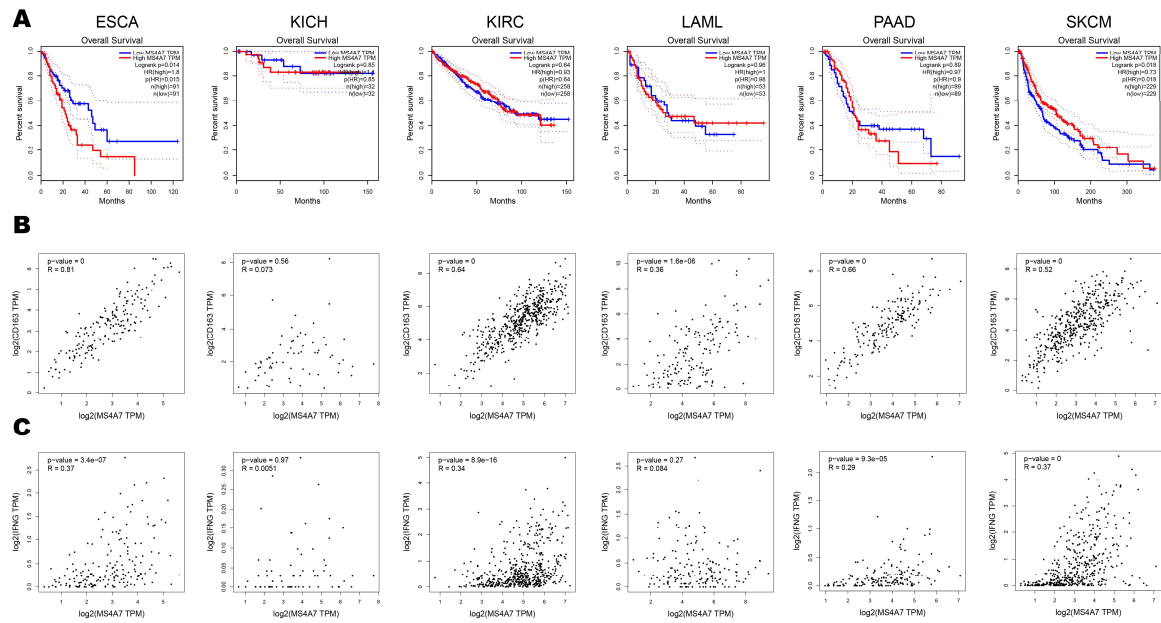

**Figure S3**

### Pan-cancer analysis of MS4A7 based on TCGA data

(A) Kaplan–Meier survival curves stratified by the expression levels of MS4A7 based on TCGA ESCA, KICH, KIRC, LAML, PAAD and SKCM datasets. (B) The correlation of MS4A7 with CD163 mRNA expression was analyzed with Pearson's test. Data were obtained from the TCGA ESCA, KICH, KIRC, LAML, PAAD and SKCM datasets. (C) The correlation of MS4A7 with IFNG mRNA expression was analyzed with Pearson's test. Data were obtained from the TCGA ESCA, KICH, KIRC, LAML, PAAD and SKCM datasets.

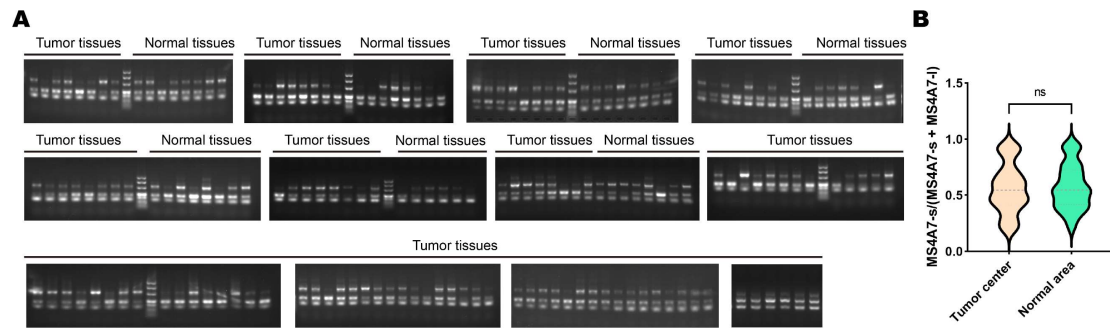

**Figure S4**

**RT-PCR of MS4A7 isoforms mRNA levels in GBM (n = 123) and adjacent normal brain tissues (n = 54)**

(A) RT-PCR of MS4A7 isoforms mRNA levels in GBM and adjacent normal brain tissues. (B) violin plot of MS4A7-s/ (MS4A7-s + MS4A7-l) ratio between GBM tissues and adjacent normal brain tissues. Statistical significances were analyzed by Student t test. ns: not significant.

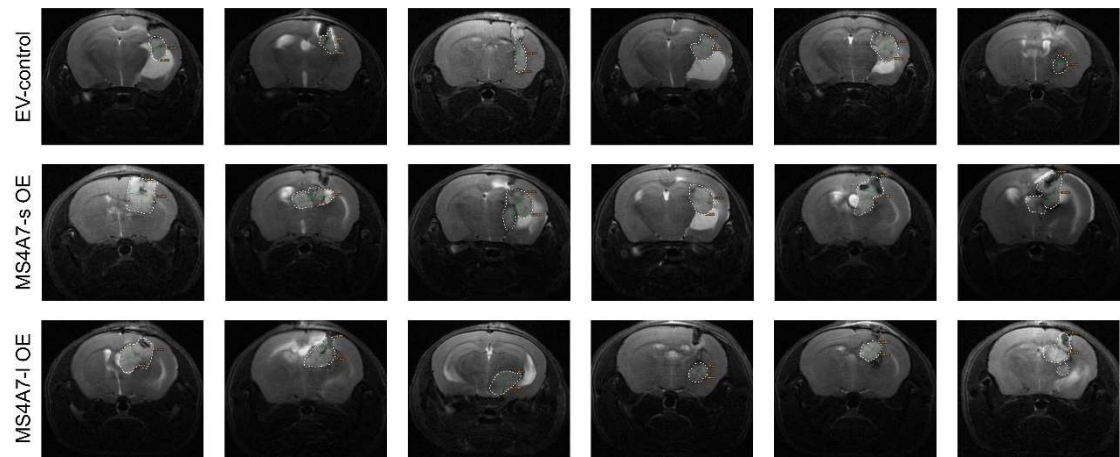

**Figure S5**

**MRI images of tumors of EV-control group, MS4A7-s OE group, and MS4A7-l OE group**

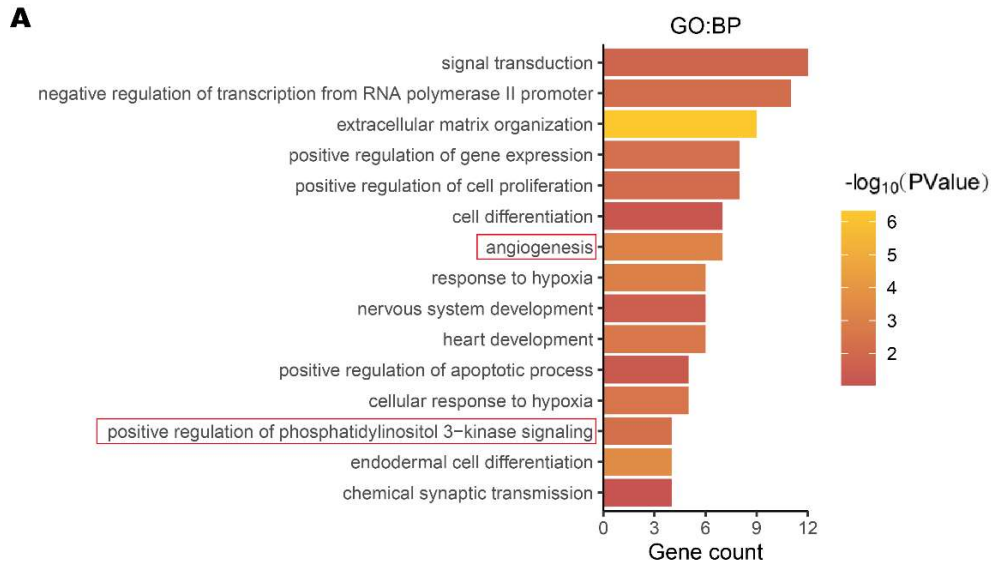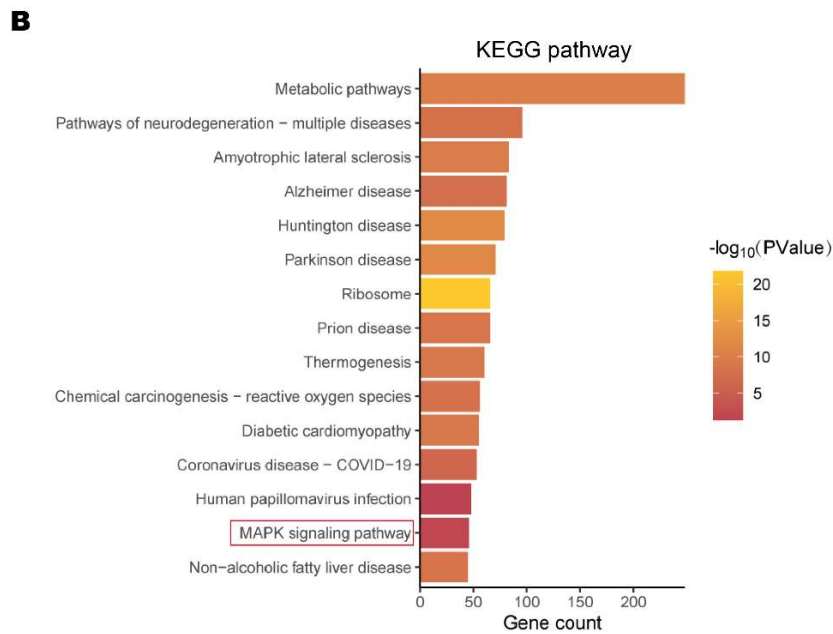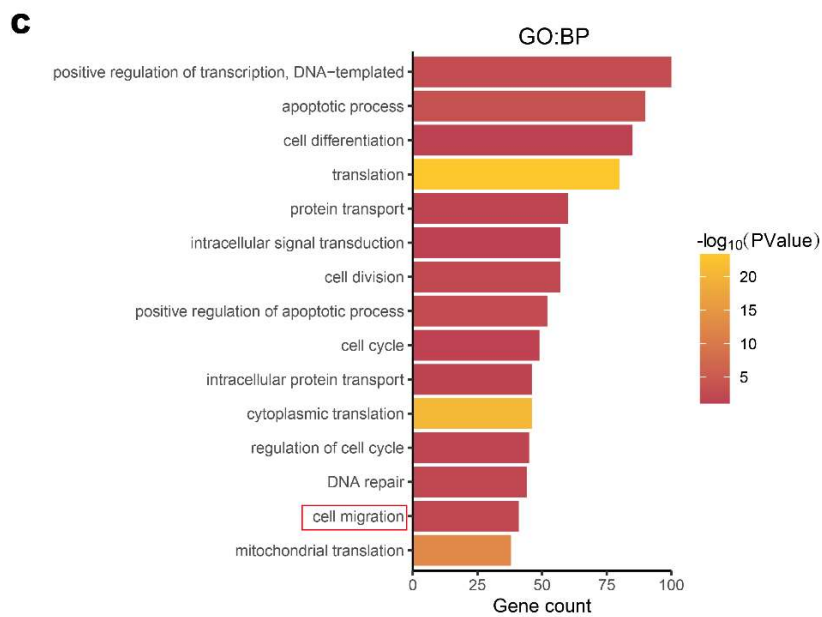

**Figure S6**

**Enrichment analyses of up-regulated genes of MS4A7-s OE and MS4A7-I OE group HMC3 cells**

(A) Up-regulated pathway of MS4A7-s OE group based on GO:BP dataset. (B) Up-regulated pathway of MS4A7-I OE group based on KEGG dataset. (C) Up-regulated pathway of MS4A7-I OE group based on GO:BP dataset.
